# Supplementary material
Source: Springer Nature journal article supplement (https://www.springermedizin.de/resource/supplementary/12984_2012_494_MOESM3_ESM.pdf/9604724)

Hip angle

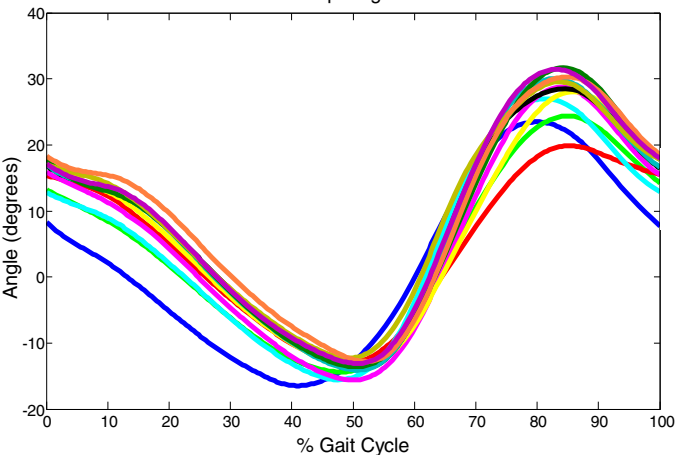

Knee angle

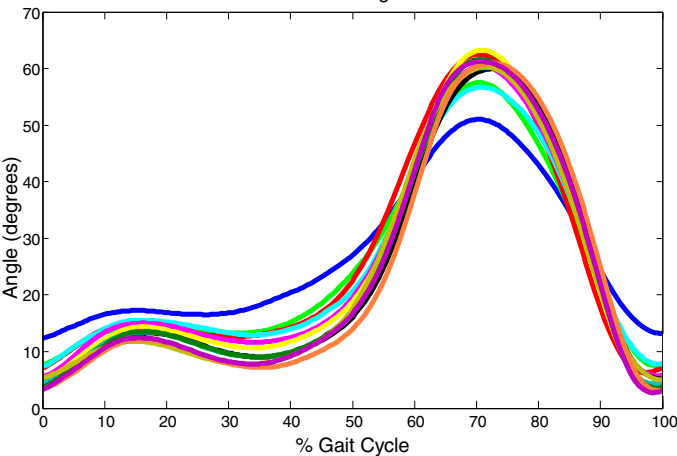

Supplement: MOESM3 [file 9604724]
